# Supplementary material
Source: PubMed Central journal article supplement (PMC4434765)
Supplement: pnas.201500316SI.pdf [file pnas.201500316SI.pdf]

# Supporting Information

Watanabe et al. 10.1073/pnas.1500316112

## SI Materials and Methods

**Terminology.** The ability to maintain slow-twitch, aerobic RM warmer than ambient water in tunas and some sharks is called RM endothermy in this paper, following the frequent use of the term endothermy for these fishes in previous studies (1–3). However, we are aware that the term endothermy may refer exclusively to birds and mammals (where relatively high and more or less constant internal body temperatures are maintained, with high resting metabolic rates as the main source of heat; ref. 4), and that the thermal strategy of tunas and some sharks may be called heterothermy (4) or mesothermy (5). Some teleosts, including billfishes (Xiphiidae and Istiophoridae), the opah *Lampris guttatus*, and possibly the butterfly mackerel *Gasterochisma melampus*, do not have warmed RM but have warmed eyes and brain, a thermal strategy called cranial endothermy (2, 6).

**Swim Speed from Acoustic Tracking Studies.** A difficulty associated with extracting swim speed data from acoustic tracking studies was that the authors often reported only the horizontal speed of the fish (as “rate of movements”) calculated from the horizontal track. Horizontal speed can be an underestimate of the true speed in the water column because fishes generally move vertically as well. To attain the best balance between the quantity and quality of the data collection, we grouped the acoustic tracking studies into those made in coastal or inland waters, and those made in pelagic waters. For the studies made in coastal or inland waters, horizontal speed of the fish was accepted as its true speed (“Acoustic tracking 2D” in the method column of Table S1), assuming that vertical movement is sufficiently small compared with horizontal movement in those shallow environments. In the pelagic waters, in contrast, many fishes show large, frequent vertical movement (7), and, thus, horizontal speed was not accepted as the true speed of the fish. Instead, we only accepted studies that estimated the speed of the pelagic fish in the 3D coordinates by combining the horizontal track and depth record of the fish (“Acoustic tracking 3D” in Table S1).

**Body Mass and Body Temperature.** In our comparative analyses of swim speed, body mass was used as a measure of body size of the animals (Table S1), although body length was normally easier to measure in fishes and, thus, more frequently reported. This choice is because fishes in our dataset vary greatly in body shape (e.g., ocean sunfish, flounder, and eel), presumably making body length a poor predictor of swim speed. Body mass is likely a better predictor of the amount of locomotory muscle and, hence, swimming performance. Moreover, the collection of body mass data for the fishes in our datasets allowed the direct comparison of allometric relationships of swim speed between fishes (this study) and nonfish vertebrate swimmers reported (8). When body mass was not reported in the data source for swim speed (9–22), it was estimated from body length by using published length–mass relationships for the species or a closely related species. Length–mass relationships have not been published for the whale shark, the largest fish species in the world. The mass for this species was set on the basis of catch records for an individual of a similar length (2.2 tons for a 5.7-m individual; ref. 23).

Body temperature was also estimated for each species in the swim speed dataset (Table S1). For fishes with RM endothermy, it was set at the value reported for the species (24–29). For fishes without RM endothermy, body temperature was set as the mean water temperature experienced by the fish at their swimming depth. When such data were unavailable (9, 10, 15, 19, 20, 22, 30–32), it was estimated by using global water temperature maps available for each month at various depths, provided by the National Oceanic and Atmospheric Administration (33).

In our comparative analyses of migration range, body mass was used as a measure of body size (Table S2). When only body length was reported in the data source (34–46), body mass was estimated by using the length–mass relationships for the species or a closely related species. When neither body mass nor length was reported (47–54), an average body mass for the species was used.

- Block BA, Finnerty JR, Stewart AFR, Kidd J (1993) Evolution of endothermy in fish: Mapping physiological traits on a molecular phylogeny. *Science* 260(5105):210–214.
- Dickson KA, Graham JB (2004) Evolution and consequences of endothermy in fishes. *Physiol Biochem Zool* 77(6):998–1018.
- Carlson JK, Goldman KJ, Lowe CG (2004) Metabolism, energetic demand, and endothermy. *Biology of Sharks and Their Relatives*, eds Carrier JC, Musick JA, Heithaus MR (CRC, Boca Raton, FL), pp 203–224.
- Clarke A, Pörtner H-O (2010) Temperature, metabolic power and the evolution of endothermy. *Biol Rev Camb Philos Soc* 85(4):703–727.
- Grady JM, Enquist BJ, Dettweiler-Robinson E, Wright NA, Smith FA (2014) Dinosaur physiology. Evidence for mesothermy in dinosaurs. *Science* 344(6189):1268–1272.
- Runcie RM, Dewar H, Hawn DR, Frank LR, Dickson KA (2009) Evidence for cranial endothermy in the opah (*Lampris guttatus*). *J Exp Biol* 212(Pt 4):461–470.
- Humphries NE, et al. (2010) Environmental context explains Lévy and Brownian movement patterns of marine predators. *Nature* 465(7301):1066–1069.
- Watanabe YY, et al. (2011) Scaling of swim speed in breath-hold divers. *J Anim Ecol* 80(1):57–68.
- Barnett A, Abrantes KG, Stevens JD, Bruce BD, Semmens JM (2010) Fine-scale movements of the broadnose sevengill shark and its main prey, the gummy shark. *PLoS ONE* 5(12):e15464.
- Sims DW (2000) Filter-feeding and cruising swimming speeds of basking sharks compared with optimal models: They filter-feed slower than predicted for their size. *J Exp Mar Biol Ecol* 249(1):65–76.
- Carlisle AB, Starr RM (2010) Tidal movements of female leopard sharks (*Triakis semifasciata*) in Elkhorn Slough, California. *Environ Biol Fishes* 89(1):31–45.
- Ruggerone GT, Quinn TP, McGregor IA, Wilkinson TD (1990) Horizontal and vertical movements of adult steelhead trout, *Oncorhynchus mykiss*, in the Dean and Fisher channels, British Columbia. *Can J Fish Aquat Sci* 47(10):1963–1969.
- Quinn TP, Terhart BA, Groot C (1989) Migratory orientation and vertical movements of homing adult sockeye salmon, *Oncorhynchus nerka*, in coastal waters. *Anim Behav* 37:587–599.
- Olson AF, Quinn TP (1993) Vertical and horizontal movements of adult Chinook salmon *Oncorhynchus tshawytscha* in the Columbia River estuary. *Fish Bull* 91(1):171–178.
- Lokkeborg S, Skajaa K, Fernö A (2000) Food-search strategy in ling (*Molva molva* L.): Crepuscular activity and use of space. *J Exp Mar Biol Ecol* 247(2):195–208.
- Fernö A, Jørgensen T, Lokkeborg S, Winger PD (2011) Variable swimming speeds in individual Atlantic cod (*Gadus morhua* L.) determined by high-resolution acoustic tracking. *Mar Biol Res* 7(3):310–313.
- Marsac F, Cayre P (1998) Telemetry applied to behaviour analysis of yellowfin tuna (*Thunnus albacares*, Bonnaterre, 1788) movements in a network of fish aggregating devices. *Hydrobiologia* 372:155–171.
- Metcalfe JD, Arnold GP, Webb PW (1990) The energetics of migration by selective tidal stream transport: An analysis for plaice tracked in the southern North Sea. *J Mar Biol Assoc U K* 70(1):149–162.
- Kerwath SE, Goetz A, Attwood CG, Sauer WHH, Wilke CG (2007) Area utilisation and activity patterns of roman *Chrysolephus laticeps* (Sparidae) in a small marine protected area. *Afr J Mar Sci* 29(2):259–270.
- Luo J, Serafy JE, Sponaugle S, Teare PB, Kieckbusch D (2009) Movement of gray snapper *Lutjanus griseus* among subtropical seagrass, mangrove, and coral reef habitats. *Mar Ecol Prog Ser* 380:255–269.
- Hanson KC, et al. (2007) Assessment of largemouth bass (*Micropterus salmoides*) behaviour and activity at multiple spatial and temporal scales utilizing a whole-lake telemetry array. *Hydrobiologia* 582:243–256.
- Starr RM, Sala E, Ballesteros E, Zabala M (2007) Spatial dynamics of the Nassau grouper *Epinephelus striatus* in a Caribbean atoll. *Mar Ecol Prog Ser* 343:239–249.
- Doiphode P (1986) On the landing of a whale shark *Rhincodon typus* Smith at Anjuna, Goa. *Mar Fish Inf Serv Tech Ext Ser* 66:29.
- Goldman KJ (1997) Regulation of body temperature in the white shark, *Carcharodon carcharias*. *J Comp Physiol B Biochem. Syst Environ Physiol* 167(6):423–429.
- Goldman KJ, Anderson SD, Latour RJ, Musick JA (2004) Homeothermy in adult salmon sharks, *Lamna ditropis*. *Environ Biol Fishes* 71(4):403–411.

26. Sepulveda CA, Kohin S, Chan C, Vetter R, Graham JB (2004) Movement patterns, depth preferences, and stomach temperatures of free-swimming juvenile mako sharks, *Isurus oxyrinchus*, in the Southern California Bight. *Mar Biol* 145(1):191–199.
27. Marcinek DJ, et al. (2001) Depth and muscle temperature of Pacific bluefin tuna examined with acoustic and pop-up satellite archival tags. *Mar Biol* 138(4):869–885.
28. Block BA, et al. (2001) Migratory movements, depth preferences, and thermal biology of Atlantic bluefin tuna. *Science* 293(5533):1310–1314.
29. Carey FG, Teal JM, Kanwisher JW, Lawson KD, Beckett JS (1971) Warm-bodied fish. *Am Zool* 11(1):137–145.
30. Gleiss AC, Norman B, Wilson RP (2011) Moved by that sinking feeling: Variable diving geometry underlies movement strategies in whale sharks. *Funct Ecol* 25(3):595–607.
31. Mitamura H, et al. (2012) Short-range homing in a site-specific fish: Search and directed movements. *J Exp Biol* 215(Pt 16):2751–2759.
32. Mitamura H, et al. (2012) Movements of lump sucker females in a northern Norwegian fjord during the spawning season. *Environ Biol Fishes* 93(4):475–481.
33. NOAA National Oceanographic Data Center. Available at [www.nodc.noaa.gov](http://www.nodc.noaa.gov). Accessed Jan. 1, 2015.
34. Stehfest KM, Patterson TA, Barnett A, Semmens JM (2014) Intraspecific differences in movement, dive behavior and vertical habitat preferences of a key marine apex predator. *Mar Ecol Prog Ser* 495:249–262.
35. Weng KC, et al. (2008) Migration of an upper trophic level predator, the salmon shark *Lamna ditropis*, between distant ecoregions. *Mar Ecol Prog Ser* 372:253–264.
36. Campana SE, Joyce W, Fowler M (2010) Subtropical pupping ground for a cold-water shark. *Can J Fish Aquat Sci* 67(5):769–773.
37. Bonfil R, et al. (2005) Transoceanic migration, spatial dynamics, and population linkages of white sharks. *Science* 310(5745):100–103.
38. Howey-Jordan LA, et al. (2013) Complex movements, philopatry and expanded depth range of a severely threatened pelagic shark, the oceanic whitetip (*Carcharhinus longimanus*) in the western North Atlantic. *PLoS ONE* 8(2):e56588.
39. Svedang H, Righton D, Jonsson P (2007) Migratory behaviour of Atlantic cod *Gadus morhua*: Natal homing is the prime stock-separating mechanism. *Mar Ecol Prog Ser* 345:1–12.
40. Childers J, Snyder S, Kohin S (2011) Migration and behavior of juvenile North Pacific albacore (*Thunnus alalunga*). *Fish Oceanogr* 20(3):157–173.
41. Loher T, Seitz A (2006) Seasonal migration and environmental conditions of Pacific halibut *Hippoglossus stenolepis*, elucidated from pop-up archival transmitting (PAT) tags. *Mar Ecol Prog Ser* 317:259–271.
42. Hunter E, Metcalfe JD, Reynolds JD (2003) Migration route and spawning area fidelity by North Sea plaice. *Proc Biol Sci* 270(1529):2097–2103.
43. Hawkes LA, et al. (2012) Migratory patterns in hawksbill turtles described by satellite tracking. *Mar Ecol Prog Ser* 461:223–232.
44. The Guy Harvey Research Institute [www.nova.edu/ocean/ghri/tracking/](http://www.nova.edu/ocean/ghri/tracking/). Accessed Jan. 1, 2015.
45. Vandeperre F, et al. (2014) Movements of blue sharks (*Prionace glauca*) across their life history. *PLoS ONE* 9(8):e103538.
46. Block BA, et al. (2011) Tracking apex marine predator movements in a dynamic ocean. *Nature* 475(7354):86–90.
47. James MC, Ottensmeyer CA, Myers RA (2005) Identification of high-use habitat and threats to leatherback sea turtles in northern waters: New directions for conservation. *Ecol Lett* 8(2):195–201.
48. Broderick AC, Coyne MS, Fuller WJ, Glen F, Godley BJ (2007) Fidelity and over-wintering of sea turtles. *Proc Biol Sci* 274(1617):1533–1538.
49. Thiebot J-B, et al. (2013) A space oddity: Geographic and specific modulation of migration in *Eudyptes* penguins. *PLoS ONE* 8(8):e71429.
50. Rasmussen K, et al. (2007) Southern Hemisphere humpback whales wintering off Central America: Insights from water temperature into the longest mammalian migration. *Biol Lett* 3(3):302–305.
51. Ream RR, Sterling JT, Loughlin TR (2005) Oceanographic features related to northern fur seal migratory movements. *Deep Sea Res Part II Top Stud Oceanogr* 52(5-6):823–843.
52. Urbán-Ramírez J, et al. (2003) A review of gray whales (*Eschrichtius robustus*) on their wintering grounds in Mexican waters. *J Cetacean Res Manag* 5(3):281–295.
53. Mate B, Mesecar R, Lagerquist B (2007) The evolution of satellite-monitored radio tags for large whales: One laboratory's experience. *Deep Sea Res Part II Top Stud Oceanogr* 54(3-4):224–247.
54. Quakenbush L, et al. (2012) Seasonal movements of the Bering-Chukchi-Beaufort stock of bowhead whales: 2006–2011 satellite telemetry results. *Report to the Scientific Committee of the International Whaling Commission, SC/64/BRG61*.

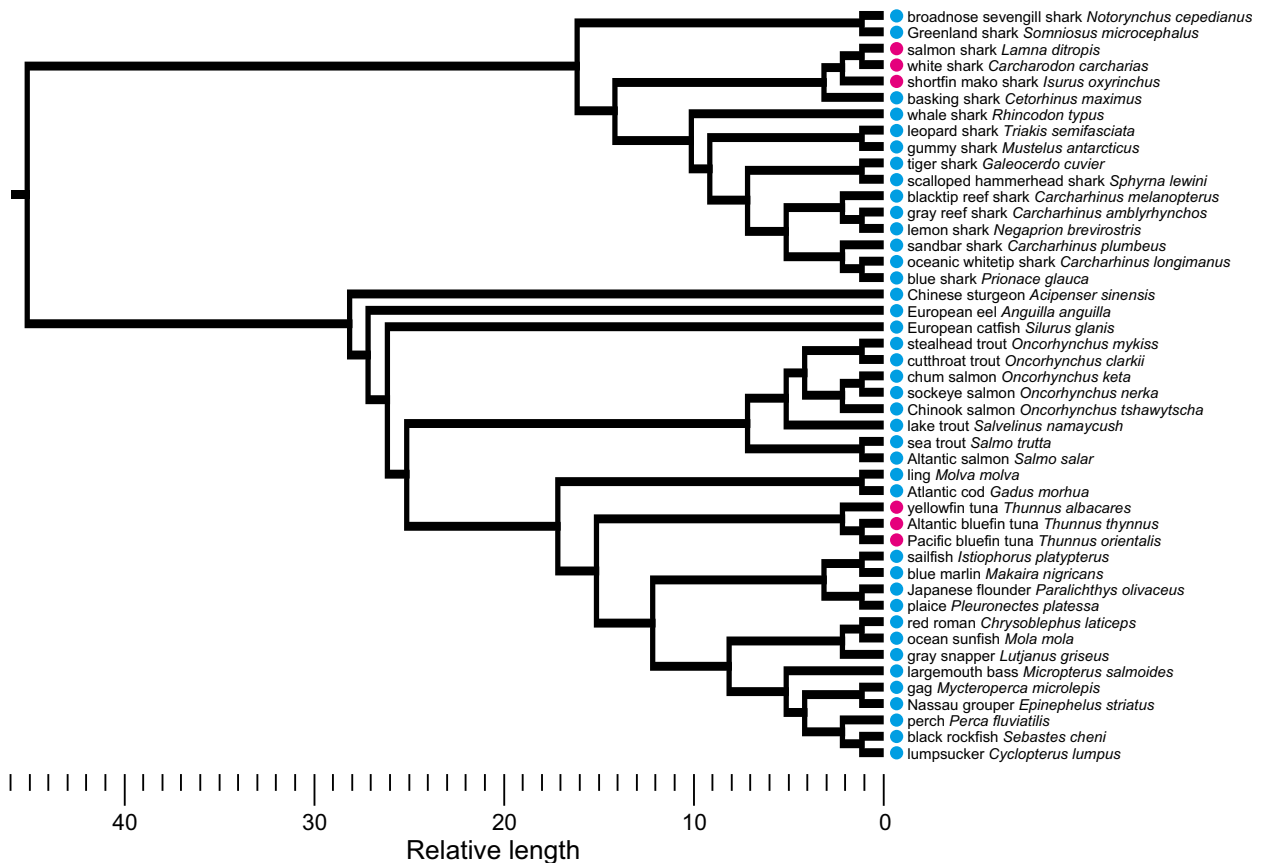

Fig. S1. Phylogenetic tree used in the comparative analysis of swim speed and the cost of transport. Pink and light blue circles represent fishes with and without RM endothermy, respectively.



Table S1. Cruising speed of fishes recorded in the wild, and their energetics estimated for that speed

| Group                             | Species                        | RM endothermy | Body length, m | Body mass, kg | Swim speed, m·s <sup>-1</sup> | Body temp, °C        | Basal metabolic rate, W | Routine metabolic rate, W | Cost of transport, J·kg <sup>-1</sup> ·m <sup>-1</sup> | Method               | Source     |
|-----------------------------------|--------------------------------|---------------|----------------|---------------|-------------------------------|----------------------|-------------------------|---------------------------|--------------------------------------------------------|----------------------|------------|
| Shark                             | Broadnose sevengill shark      | No            | 2.13           | 50            | 0.48                          | 16                   | 5.4                     | 8.2                       | 0.34                                                   | Acoustic tracking 2D | 1          |
|                                   | <i>Notorynchus cepedianus</i>  | No            | 2.98           | 263           | 0.34                          | 2                    | 11.5                    | 14.6                      | 0.16                                                   | Speed sensor         | 2          |
|                                   | Greenland shark                | Yes           | 2.15           | 155           | 1.09                          | 25 (13) <sup>†</sup> | 38.1                    | 82.5                      | 0.49                                                   | Speed sensor         | This study |
|                                   | <i>Somniosus microcephalus</i> | Yes           | 3.60           | 428           | 2.25                          | 26 (15) <sup>†</sup> | 102.9                   | 250.7                     | 0.26                                                   | Acoustic tracking 2D | 3          |
|                                   | White shark                    | Yes           | 1.10           | 16            | 1.86                          | 22 (18) <sup>†</sup> | 6.7                     | 32.5                      | 1.09                                                   | Acoustic tracking 3D | 4          |
|                                   | <i>Carcharodon carcharias</i>  | No            | 4.00           | 400           | 1.08                          | 13                   | 29.0                    | 46.9                      | 0.11                                                   | Boat                 | 5          |
|                                   | Shortfin mako shark            | No            | 6.00           | 2200          | 0.85                          | 25                   | 236.3                   | 313.3                     | 0.17                                                   | Pitch                | 6          |
|                                   | <i>Isurus oxyrinchus</i>       | No            | 1.19           | 7.7           | 0.34                          | 18                   | 1.2                     | 1.9                       | 0.73                                                   | Acoustic tracking 2D | 7          |
|                                   | Basking shark                  | No            | 0.88           | 2.3           | 0.33                          | 16                   | 0.36                    | 0.67                      | 0.89                                                   | Acoustic tracking 2D | 1          |
|                                   | <i>Cetorhinus maximus</i>      | No            | 3.57           | 266           | 0.69                          | 26                   | 38.8                    | 56.0                      | 0.31                                                   | Speed sensor         | 8          |
|                                   | Whale shark                    | No            | 0.57           | 0.76          | 0.46                          | 26                   | 0.23                    | 0.64                      | 1.84                                                   | Tailbeat             | 9          |
|                                   | <i>Rhincodon typus</i>         | No            | 1.20           | 11.9          | 0.52                          | 29                   | 2.9                     | 5.9                       | 0.95                                                   | Speed sensor         | This study |
|                                   | Leopard shark                  | No            | 1.57           | 26.1          | 0.59                          | 28                   | 5.6                     | 10.4                      | 0.67                                                   | Speed sensor         | This study |
|                                   | <i>Triakis semifasciata</i>    | No            | 1.71           | 27            | 0.63                          | 22                   | 4.2                     | 7.9                       | 0.46                                                   | Speed sensor         | 10         |
|                                   | Gummy shark                    | No            | 0.83           | 5.2           | 0.42                          | 22                   | 1.0                     | 2.2                       | 0.99                                                   | Acoustic tracking 2D | 11         |
|                                   | <i>Mustelus antarcticus</i>    | No            | 2.09           | 97            | 0.71                          | 25                   | 15.2                    | 27.1                      | 0.39                                                   | Speed sensor         | This study |
|                                   | Tiger shark                    | No            | 2.52           | 105           | 0.44                          | 22                   | 14.0                    | 19.7                      | 0.43                                                   | Speed sensor         | 12         |
|                                   | <i>Galeocerdo cuvier</i>       | No            | 2.97           | 198           | 1.10                          | 20                   | 22.2                    | 41.0                      | 0.19                                                   | Speed sensor         | 13         |
|                                   | Scalloped hammerhead shark     | No            | 0.81           | 1.18          | 0.42                          | 13                   | 0.17                    | 0.38                      | 0.76                                                   | Acoustic tracking 2D | 14         |
|                                   | <i>Sphyrna lewini</i>          | No            | 1.21           | 10.3          | 0.36                          | 18                   | 1.5                     | 2.5                       | 0.68                                                   | Acoustic tracking 2D | 15         |
| Blacktip reef shark               | No                             | 0.79          | 5.0            | 0.71          | 13                            | 0.61                 | 1.9                     | 0.53                      | Acoustic tracking 2D                                   | 16                   |            |
| <i>Carcharhinus melanopterus</i>  | No                             | 0.49          | 1.01           | 0.22          | 12                            | 0.14                 | 0.29                    | 1.32                      | Acoustic tracking 2D                                   | 17                   |            |
| Gray reef shark                   |                                |               |                |               |                               |                      |                         |                           |                                                        |                      |            |
| <i>Carcharhinus amblyrhynchos</i> |                                |               |                |               |                               |                      |                         |                           |                                                        |                      |            |
| Lemon shark                       |                                |               |                |               |                               |                      |                         |                           |                                                        |                      |            |
| <i>Negaprion brevirostris</i>     |                                |               |                |               |                               |                      |                         |                           |                                                        |                      |            |
| Sandbar shark                     |                                |               |                |               |                               |                      |                         |                           |                                                        |                      |            |
| <i>Carcharhinus plumbeus</i>      |                                |               |                |               |                               |                      |                         |                           |                                                        |                      |            |
| Oceanic whitetip shark            |                                |               |                |               |                               |                      |                         |                           |                                                        |                      |            |
| <i>Carcharhinus longimanus</i>    |                                |               |                |               |                               |                      |                         |                           |                                                        |                      |            |
| Blue shark                        |                                |               |                |               |                               |                      |                         |                           |                                                        |                      |            |
| <i>Prionace glauca</i>            |                                |               |                |               |                               |                      |                         |                           |                                                        |                      |            |
| Chinese sturgeon                  |                                |               |                |               |                               |                      |                         |                           |                                                        |                      |            |
| <i>Acipenser sinensis</i>         |                                |               |                |               |                               |                      |                         |                           |                                                        |                      |            |
| European eel                      |                                |               |                |               |                               |                      |                         |                           |                                                        |                      |            |
| <i>Anguilla anguilla</i>          |                                |               |                |               |                               |                      |                         |                           |                                                        |                      |            |
| European catfish                  |                                |               |                |               |                               |                      |                         |                           |                                                        |                      |            |
| <i>Silurus glanis</i>             |                                |               |                |               |                               |                      |                         |                           |                                                        |                      |            |
| Stealth trout                     |                                |               |                |               |                               |                      |                         |                           |                                                        |                      |            |
| <i>Oncorhynchus mykiss</i>        |                                |               |                |               |                               |                      |                         |                           |                                                        |                      |            |
| Cutthroat trout                   |                                |               |                |               |                               |                      |                         |                           |                                                        |                      |            |
| <i>Oncorhynchus clarkii</i>       |                                |               |                |               |                               |                      |                         |                           |                                                        |                      |            |

Table S1. Cont.

| Group | Species                         | RM endothermy | Body length, m | Body mass, kg | Swim speed, $m \cdot s^{-1}$ | Body temp, °C        | Basal metabolic rate, W | Routine metabolic rate, W | Cost of transport, $J \cdot kg^{-1} \cdot m^{-1}$ | Method               | Source |
|-------|---------------------------------|---------------|----------------|---------------|------------------------------|----------------------|-------------------------|---------------------------|---------------------------------------------------|----------------------|--------|
|       | Chum salmon                     | No            | 0.65           | 3.3           | 0.75                         | 15                   | 0.47                    | 1.7                       | 0.70                                              | Speed sensor         | 18     |
|       | <i>Oncorhynchus keta</i>        |               |                |               |                              |                      |                         |                           |                                                   |                      |        |
|       | Sockeye salmon                  | No            | 0.67           | 2.5           | 0.67                         | 11                   | 0.30                    | 1.0                       | 0.60                                              | Acoustic tracking 2D | 19     |
|       | <i>Oncorhynchus nerka</i>       |               |                |               |                              |                      |                         |                           |                                                   |                      |        |
|       | Chinook salmon                  | No            | 0.84           | 6.2           | 0.64                         | 15                   | 0.82                    | 2.3                       | 0.57                                              | Acoustic tracking 2D | 20     |
|       | <i>Oncorhynchus tshawytscha</i> |               |                |               |                              |                      |                         |                           |                                                   |                      |        |
|       | Lake trout                      | No            | 0.58           | 2.14          | 0.69                         | 21                   | 0.44                    | 1.6                       | 1.10                                              | Acoustic tracking 2D | 21     |
|       | <i>Salvelinus namaycush</i>     |               |                |               |                              |                      |                         |                           |                                                   |                      |        |
|       | Sea trout                       | No            | 0.20           | 0.062         | 0.14                         | 11                   | 0.012                   | 0.030                     | 3.50                                              | Acoustic tracking 2D | 22     |
|       | <i>Salmo trutta</i>             |               |                |               |                              |                      |                         |                           |                                                   |                      |        |
|       | Altantic salmon                 | No            | 0.15           | 0.025         | 0.09                         | 11                   | 0.0053                  | 0.012                     | 5.68                                              | Acoustic tracking 2D | 23     |
|       | <i>Salmo salar</i>              |               |                |               |                              |                      |                         |                           |                                                   |                      |        |
|       | Ling                            | No            | 0.60           | 0.6           | 0.08                         | 8                    | 0.074                   | 0.10                      | 2.02                                              | Acoustic tracking 2D | 24     |
|       | <i>Molva molva</i>              |               |                |               |                              |                      |                         |                           |                                                   |                      |        |
|       | Atlantic cod                    | No            | 0.40           | 0.8           | 0.29                         | 5                    | 0.082                   | 0.22                      | 0.95                                              | Acoustic tracking 2D | 25     |
|       | <i>Gadus morhua</i>             |               |                |               |                              |                      |                         |                           |                                                   |                      |        |
|       | Yellowfin tuna                  | Yes           | 0.80           | 11.7          | 1.24                         | 28 (23) <sup>†</sup> | 4.2                     | 19.4                      | 1.34                                              | Acoustic tracking 3D | 26     |
|       | <i>Thunnus albacares</i>        |               |                |               |                              |                      |                         |                           |                                                   |                      |        |
|       | Altantic bluefin tuna           | Yes           | 2.46           | 240           | 2.00                         | 25 (13) <sup>†</sup> | 50.9                    | 146.0                     | 0.30                                              | Acoustic tracking 3D | 27     |
|       | <i>Thunnus thynnus</i>          |               |                |               |                              |                      |                         |                           |                                                   |                      |        |
|       | Pacific bluefin tuna            | Yes           | 1.00           | 22.6          | 1.37                         | 25 (16) <sup>†</sup> | 7.4                     | 30.8                      | 0.99                                              | Acoustic tracking 3D | 28     |
|       | <i>Thunnus orientalis</i>       | No*           | 1.34           | 20            | 0.64                         | 22                   | 3.3                     | 6.9                       | 0.54                                              | Acoustic tracking 2D | 29     |
|       | Sailfish                        |               |                |               |                              |                      |                         |                           |                                                   |                      |        |
|       | <i>Istiophorus platypterus</i>  |               |                |               |                              |                      |                         |                           |                                                   |                      |        |
|       | Blue marlin                     | No*           | 2.20           | 85            | 0.50                         | 28                   | 15.7                    | 23.9                      | 0.56                                              | Speed sensor         | 30     |
|       | <i>Makaira nigricans</i>        |               |                |               |                              |                      |                         |                           |                                                   |                      |        |
|       | Japanese flounder               | No            | 0.52           | 2.2           | 0.31                         | 14                   | 0.31                    | 0.75                      | 1.09                                              | Speed sensor         | 31     |
|       | <i>Paralichthys olivaceus</i>   |               |                |               |                              |                      |                         |                           |                                                   |                      |        |
|       | Plaice                          | No            | 0.42           | 0.68          | 0.24                         | 7                    | 0.079                   | 0.18                      | 1.12                                              | Acoustic tracking 2D | 32     |
|       | <i>Pleuronectes platessa</i>    |               |                |               |                              |                      |                         |                           |                                                   |                      |        |
|       | Red roman                       | No            | 0.32           | 0.48          | 0.14                         | 19                   | 0.11                    | 0.21                      | 3.16                                              | Acoustic tracking 2D | 33     |
|       | <i>Chrysoblephus laticeps</i>   |               |                |               |                              |                      |                         |                           |                                                   |                      |        |
|       | Ocean sunfish                   | No            | 1.15           | 87            | 0.60                         | 16                   | 8.8                     | 19.4                      | 0.37                                              | Speed sensor         | 34     |
|       | <i>Mola mola</i>                |               |                |               |                              |                      |                         |                           |                                                   |                      |        |
|       | Gray snapper                    | No            | 0.33           | 0.69          | 0.57                         | 29                   | 0.24                    | 1.2                       | 3.04                                              | Acoustic tracking 2D | 35     |
|       | <i>Lutjanus griseus</i>         |               |                |               |                              |                      |                         |                           |                                                   |                      |        |
|       | Largemouth bass                 | No            | 0.40           | 0.93          | 0.12                         | 6                    | 0.10                    | 0.17                      | 1.50                                              | Acoustic tracking 2D | 36     |
|       | <i>Micropterus salmoides</i>    |               |                |               |                              |                      |                         |                           |                                                   |                      |        |
|       | Gag                             | No            | 0.66           | 3.8           | 0.14                         | 18                   | 0.62                    | 0.92                      | 1.74                                              | Acoustic tracking 2D | 37     |
|       | <i>Mycteroperca microlepis</i>  |               |                |               |                              |                      |                         |                           |                                                   |                      |        |
|       | Nassau grouper                  | No            | 0.73           | 6.0           | 0.53                         | 27                   | 1.5                     | 3.9                       | 1.22                                              | Acoustic tracking 2D | 38     |
|       | <i>Epinephelus striatus</i>     |               |                |               |                              |                      |                         |                           |                                                   |                      |        |
|       | Perch                           | No            | 0.26           | 0.26          | 0.10                         | 18                   | 0.059                   | 0.11                      | 4.26                                              | Acoustic tracking 2D | 39     |
|       | <i>Perca fluviatilis</i>        |               |                |               |                              |                      |                         |                           |                                                   |                      |        |





**Table S2. Maximum annual migration range of vertebrate swimmers**

| Group                                             | Species                                                    | Elevated body core temperature                           | Body mass, kg | Maximum migration range, km | Distal positions on migration path   | Method                               | Source       |    |
|---------------------------------------------------|------------------------------------------------------------|----------------------------------------------------------|---------------|-----------------------------|--------------------------------------|--------------------------------------|--------------|----|
| Shark                                             | Broadnose sevengill shark<br><i>Notorynchus cepedianus</i> | No                                                       | 54            | 1,000                       | S44°00' E147°30'<br>S35°00' E151°00' | Pop-up tag                           | 1            |    |
|                                                   | Salmon shark<br><i>Lamna ditropis</i>                      | Yes                                                      | 117           | 4,300                       | N58°00' W152°00'<br>N26°00' W120°00' | Argos tag                            | 2            |    |
|                                                   | Porbeagle shark<br><i>Lamna nasus</i>                      | Yes                                                      | 105           | 2,700                       | N44°00' W69°00'<br>N20°00' W62°00'   | Pop-up tag                           | 3            |    |
|                                                   | White shark<br><i>Carcharodon carcharias</i>               | Yes                                                      | 315           | 9,300                       | S37°00' E15°00'<br>S22°00' E113°50'  | Pop-up tag                           | 4            |    |
|                                                   | Shortfin mako shark<br><i>Isurus oxyrinchus</i>            | Yes                                                      | 56            | 4,000                       | N46°00' W44°00'<br>N10°00' W48°00'   | Argos tag                            | 5            |    |
|                                                   | Tiger shark<br><i>Galeocerdo cuvier</i>                    | No                                                       | 210           | 2,600                       | S11°00' E132°00'<br>S24°00' E111°00' | Argos tag                            | 5            |    |
|                                                   | Oceanic whitetip shark<br><i>Carcharhinus longimanus</i>   | No                                                       | 82            | 2,300                       | N30°00' W76°00'<br>N18°00' W58°00'   | Pop-up tag                           | 6            |    |
|                                                   | Blue shark<br><i>Prionace glauca</i>                       | No                                                       | 23            | 2,600                       | N34°00' W46°00'<br>N49°00' W22°00'   | Argos tag                            | 7            |    |
|                                                   | Bony fish                                                  | Atlantic cod<br><i>Gadus morhua</i>                      | No            | 1.7                         | 900                                  | N58°00' E11°20'<br>N52°00' E02°00'   | Archival tag | 8  |
|                                                   |                                                            | Yellowfin tuna<br><i>Thunnus albacares</i>               | Yes           | 17                          | 2,500                                | N33°00' W119°00'<br>N17°00' W137°00' | Archival tag | 9  |
|                                                   |                                                            | Southern bluefin tuna<br><i>Thunnus maccoyii</i>         | Yes           | 20                          | 5,900                                | S38°00' E140°00'<br>S31°00' E75°00'  | Archival tag | 10 |
|                                                   |                                                            | Atlantic bluefin tuna<br><i>Thunnus thynnus</i>          | Yes           | 244                         | 5,500                                | N24°00' W73°00'<br>N47°00' W16°00'   | Pop-up tag   | 11 |
|                                                   |                                                            | Pacific bluefin tuna<br><i>Thunnus orientalis</i>        | Yes           | 23                          | 3,900                                | N25°00' W113°00'<br>N37°00' W152°00' | Archival tag | 9  |
|                                                   |                                                            | Albacore<br><i>Thunnus alalunga</i>                      | Yes           | 10                          | 5,000                                | N30°00' W180°00'<br>N45°00' W126°00' | Archival tag | 12 |
| Swordfish<br><i>Xiphias gladius</i>               |                                                            | No*                                                      | 150           | 3,200                       | N41°50' W65°40'<br>N14°00' W75°00'   | Pop-up tag                           | 13           |    |
| Striped marlin<br><i>Kajikia audax</i>            |                                                            | No*                                                      | 75            | 2,600                       | S34°10' E172°20'<br>S14°00' E158°00' | Pop-up tag                           | 14           |    |
| Blue marlin<br><i>Makaira nigricans</i>           |                                                            | No*                                                      | 105           | 1,000                       | N27°50' W95°30'<br>N19°30' W92°60'   | Pop-up tag                           | 15           |    |
| Yellowtail<br><i>Seriola quinqueradiata</i>       |                                                            | No                                                       | 9.5           | 2,500                       | N28°40' E124°10'<br>N46°30' E141°00' | Archival tag                         | 16           |    |
| Pacific halibut<br><i>Hippoglossus stenolepis</i> |                                                            | No                                                       | 23            | 1,200                       | N59°00' W141°00'<br>N54°50' W158°30' | Pop-up tag                           | 17           |    |
| Plaice<br><i>Pleuronectes platessa</i>            |                                                            | No                                                       | 0.6           | 300                         | N57°30' E03°50'<br>N54°40' E04°00'   | Tidal location                       | 18           |    |
| Marine mammal                                     |                                                            | Humpback whale<br><i>Megaptera novaeangliae</i>          | Yes           | 34,000                      | 8,400                                | S65°21' W64°58'<br>N08°39' W83°43'   | Photo ID     | 19 |
|                                                   |                                                            | Blue whale<br><i>Balaenoptera musculus</i>               | Yes           | 90,000                      | 5,100                                | N19°00' W106°00'<br>N52°00' W147°00' | Argos tag    | 20 |
|                                                   |                                                            | Gray whale<br><i>Eschrichtius robustus</i>               | Yes           | 17,000                      | 5,200                                | N26°40' W113°20'<br>N54°20' W164°50' | Radio tag    | 21 |
|                                                   |                                                            | North Atlantic right whale<br><i>Eubalaena glacialis</i> | Yes           | 58,000                      | 2,200                                | N31°10' W80°50'<br>N44°30' W62°50'   | Argos tag    | 22 |
|                                                   |                                                            | Bowhead whale<br><i>Balaena mysticetus</i>               | Yes           | 28,000                      | 3,100                                | N62°00' W178°00'<br>N74°00' W105°00' | Argos tag    | 23 |
|                                                   | Northern fur seal<br><i>Callorhinus ursinus</i>            | Yes                                                      | 40            | 4,600                       | N60°00' W171°00'<br>N33°00' W122°00' | Argos tag                            | 24           |    |
|                                                   | Antarctic fur seal<br><i>Arctocephalus gazella</i>         | Yes                                                      | 37            | 2,000                       | S54°00' W38°00'<br>S43°30' W60°00'   | Argos tag                            | 25           |    |
|                                                   | Northern elephant seal<br><i>Mirounga angustirostris</i>   | Yes                                                      | 410           | 5,400                       | N37°06' W122°20'<br>N41°00' E174°00' | Argos tag                            | 26           |    |
|                                                   | Southern elephant seal<br><i>Mirounga leonina</i>          | Yes                                                      | 380           | 4,800                       | S54°40' E158°60'<br>S57°00' W120°00' | Argos tag                            | 27           |    |
|                                                   | Hooded seal<br><i>Cystophora cristata</i>                  | Yes                                                      | 122           | 3,300                       | N75°00' W13°00'<br>N51°00' W55°00'   | Argos tag                            | 28           |    |

Table S2. Cont.

| Group                  | Species                       | Elevated body core temperature | Body mass, kg | Maximum migration range, km | Distal positions on migration path | Method       | Source |
|------------------------|-------------------------------|--------------------------------|---------------|-----------------------------|------------------------------------|--------------|--------|
| Penguin                | Macaroni penguin              | Yes                            | 4.2           | 3,600                       | S49°30' E70°30'                    | Archival tag | 29     |
|                        | <i>Eudyptes chrysolophus</i>  |                                |               |                             | S51°00' E122°00'                   |              |        |
|                        | Northern rockhopper penguin   | Yes                            | 3.1           | 2,800                       | S37°50' E77°36'                    | Archival tag | 29     |
|                        | <i>Eudyptes moseleyi</i>      |                                |               |                             | S44°00' E110°00'                   |              |        |
| Sea turtle             | Eastern rockhopper penguin    | Yes                            | 2.4           | 3,600                       | S49°30' E70°30'                    | Archival tag | 29     |
|                        | <i>Eudyptes filholi</i>       |                                |               |                             | S49°00' E121°00'                   |              |        |
|                        | Leatherback turtle            | Yes                            | 330           | 4,900                       | N47°00' W55°00'                    | Argos tag    | 30     |
|                        | <i>Dermochelys coriacea</i>   |                                |               |                             | N3°00' W47°00'                     |              |        |
|                        | Green turtle                  | No                             | 130           | 1,700                       | N35°22' E33°40'                    | Argos tag    | 31     |
|                        | <i>Chelonia mydas</i>         |                                |               |                             | N31°26' E16°00'                    |              |        |
|                        | Hawksbill turtle              | No                             | 87            | 1,400                       | N18°10' W68°30'                    | Argos tag    | 32     |
|                        | <i>Eretmochelys imbricata</i> |                                |               |                             | N15°00' W81°00'                    |              |        |
| Loggerhead turtle      | No                            | 70                             | 2,100         | N35°22' E33°40'             | Argos tag                          | 31           |        |
| <i>Caretta caretta</i> |                               |                                |               | N34°30' E10°40'             |                                    |              |        |

\*These species have cranial endothermy, in which eye and brain temperatures are elevated. See the terminology section in *SI Materials and Methods* for details.

- Stehfest KM, Patterson TA, Barnett A, Semmens JM (2014) Intraspecific differences in movement, dive behavior and vertical habitat preferences of a key marine apex predator. *Mar Ecol Prog Ser* 495:249–262.
- Weng KC, et al. (2008) Migration of an upper trophic level predator, the salmon shark *Lamna ditropis*, between distant ecoregions. *Mar Ecol Prog Ser* 372:253–264.
- Campana SE, Joyce W, Fowler M (2010) Subtropical pupping ground for a cold-water shark. *Can J Fish Aquat Sci* 67(5):769–773.
- Bonfil R, et al. (2005) Transoceanic migration, spatial dynamics, and population linkages of white sharks. *Science* 310(5745):100–103.
- The Guy Harvey Research Institute [www.nova.edu/ocean/ghri/tracking/](http://www.nova.edu/ocean/ghri/tracking/). Accessed January 1, 2015.
- Howey-Jordan LA, et al. (2013) Complex movements, philopatry and expanded depth range of a severely threatened pelagic shark, the oceanic whitetip (*Carcharhinus longimanus*) in the western North Atlantic. *PLoS ONE* 8(2):e56588.
- Vandeperre F, et al. (2014) Movements of blue sharks (*Prionace glauca*) across their life history. *PLoS ONE* 9(8):e103538.
- Svedang H, Righton D, Jonsson P (2007) Migratory behaviour of Atlantic cod *Gadus morhua*: Natal homing is the prime stock-separating mechanism. *Mar Ecol Prog Ser* 345:1–12.
- Block BA, et al. (2011) Tracking apex marine predator movements in a dynamic ocean. *Nature* 475(7354):86–90.
- Bestley S, Patterson TA, Hindell MA, Gunn JS (2008) Feeding ecology of wild migratory tunas revealed by archival tag records of visceral warming. *J Anim Ecol* 77(6):1223–1233.
- Galuardi B, et al. (2010) Complex migration routes of Atlantic bluefin tuna (*Thunnus thynnus*) question current population structure paradigm. *Can J Fish Aquat Sci* 67(6):966–976.
- Childers J, Snyder S, Kohin S (2011) Migration and behavior of juvenile North Pacific albacore (*Thunnus alalunga*). *Fish Oceanogr* 20(3):157–173.
- Neilson JD, et al. (2009) Investigations of horizontal movements of Atlantic swordfish using pop-up satellite archival tags. *Tagging and Tracking of Marine Animals with Electronic Devices*, eds Nielsen JL, et al., pp 145–159.
- Domeier ML (2006) An analysis of Pacific striped marlin (*Tetrapturus audax*) horizontal movement patterns using pop-up satellite archival tags. *Bull Mar Sci* 79(3):811–825.
- Kraus RT, Wells RJD, Rooker JR (2011) Horizontal movements of Atlantic blue marlin (*Makaira nigricans*) in the Gulf of Mexico. *Mar Biol* 158(3):699–713.
- Ino S, et al. (2008) Migration of the adult yellowtail (*Seriola quinqueradiata*) as estimated by archival tagging experiments in the Tsushima Warm Current. *Bull Jap Soc Fish Oceanogr* 72(2):92–100.
- Loher T, Seitz A (2006) Seasonal migration and environmental conditions of Pacific halibut *Hippoglossus stenolepis*, elucidated from pop-up archival transmitting (PAT) tags. *Mar Ecol Prog Ser* 317:259–271.
- Hunter E, Metcalfe JD, Reynolds JD (2003) Migration route and spawning area fidelity by North Sea plaice. *Proc Biol Sci* 270(1529):2097–2103.
- Rasmussen K, et al. (2007) Southern Hemisphere humpback whales wintering off Central America: Insights from water temperature into the longest mammalian migration. *Biol Lett* 3(3):302–305.
- Bailey H, et al. (2009) Behavioural estimation of blue whale movements in the Northeast Pacific from state-space model analysis of satellite tracks. *Endanger Species Res* 10:93–106.
- Urbán-Ramírez J, et al. (2003) A review of gray whales (*Eschrichtius robustus*) on their wintering grounds in Mexican waters. *J Cetacean Res Manag* 5(3):281–295.
- Mate B, Mesecar R, Lagerquist B (2007) The evolution of satellite-monitored radio tags for large whales: One laboratory's experience. *Deep Sea Res Part II Top Stud Oceanogr* 54(3–4):224–247.
- Quakenbush L, et al. (2012) Seasonal movements of the Bering-Chukchi-Beaufort stock of bowhead whales: 2006–2011 satellite telemetry results. *Report to the Scientific Committee of the International Whaling Commission, SC/64/BRG61*.
- Ream RR, Sterling JT, Loughlin TR (2005) Oceanographic features related to northern fur seal migratory movements. *Deep Sea Res Part II Top Stud Oceanogr* 52(5–6):823–843.
- Staniland IJ, Robinson SL, Silk JRD, Warren N, Trathan PN (2012) Winter distribution and haul-out behaviour of female Antarctic fur seals from South Georgia. *Mar Biol* 159(2):291–301.
- Robinson PW, et al. (2012) Foraging behavior and success of a mesopelagic predator in the northeast Pacific Ocean: Insights from a data-rich species, the northern elephant seal. *PLoS ONE* 7(5):e36728.
- Schick RS, et al. (2013) Estimating resource acquisition and at-sea body condition of a marine predator. *J Anim Ecol* 82(6):1300–1315.
- Andersen JM, Wiersma YF, Stenson G, Hammill MO, Rosing-Asvid A (2009) Movement patterns of hooded seals (*Cystophora cristata*) in the Northwest Atlantic Ocean during the post-moult and pre-breed seasons. *J Northwest Atl Fish Sci* 42:1–11.
- Thiebot J-B, et al. (2013) A space oddity: Geographic and specific modulation of migration in *Eudyptes* penguins. *PLoS ONE* 8(8):e71429.
- James MC, Ottensmeyer CA, Myers RA (2005) Identification of high-use habitat and threats to leatherback sea turtles in northern waters: New directions for conservation. *Ecol Lett* 8(2):195–201.
- Broderick AC, Coyne MS, Fuller WJ, Glen F, Godley BJ (2007) Fidelity and over-wintering of sea turtles. *Proc Biol Sci* 274(1617):1533–1538.
- Hawkes LA, et al. (2012) Migratory patterns in hawksbill turtles described by satellite tracking. *Mar Ecol Prog Ser* 461:223–232.



**Table S3. Fitting of nonphylogenetic regression models**

| Model                                                  | $R^2$ | AIC   | $\Delta$ AIC | wAIC  |
|--------------------------------------------------------|-------|-------|--------------|-------|
| <b>Swim speed ~ Body mass + Body temp + Endothermy</b> | 0.70  | -6.3  | 0            | 0.78  |
| Swim speed ~ Body mass + Endothermy                    | 0.67  | -3.7  | 2.6          | 0.21  |
| Swim speed ~ Body mass + Body temp                     | 0.61  | 4.6   | 10.8         | <0.01 |
| Swim speed ~ Body mass                                 | 0.54  | 9.7   | 16.0         | <0.01 |
| Swim speed ~1                                          | 0     | 43.6  | 49.9         | <0.01 |
| <b>COT ~ Body mass + Body temp + Endothermy</b>        | 0.90  | -48.1 | 0            | 0.89  |
| COT ~ Body mass + Body temp                            | 0.88  | -43.8 | 4.3          | 0.10  |
| COT ~ Body mass + Endothermy                           | 0.85  | -32.3 | 15.8         | <0.01 |
| COT ~ Body mass                                        | 0.82  | -25.4 | 22.7         | <0.01 |
| COT ~1                                                 | 0     | 50.4  | 98.5         | <0.01 |
| <b>Migration range ~ Body mass + Endothermy</b>        | 0.68  | -1.7  | 0            | >0.99 |
| Migration range ~ Body mass                            | 0.37  | 10.3  | 12.0         | <0.01 |
| Migration range ~1                                     | 0     | 17.4  | 19.1         | <0.01 |

The best models are shown in bold. wAIC, Akaike weight.
